# Supplementary material for: Necrosis- and apoptosis-related Met cleavages have divergent functional consequences
Source: PubMed Central journal article supplement (PMC4669710; doi:10.1038/cddis.2015.132), 2015-05-21

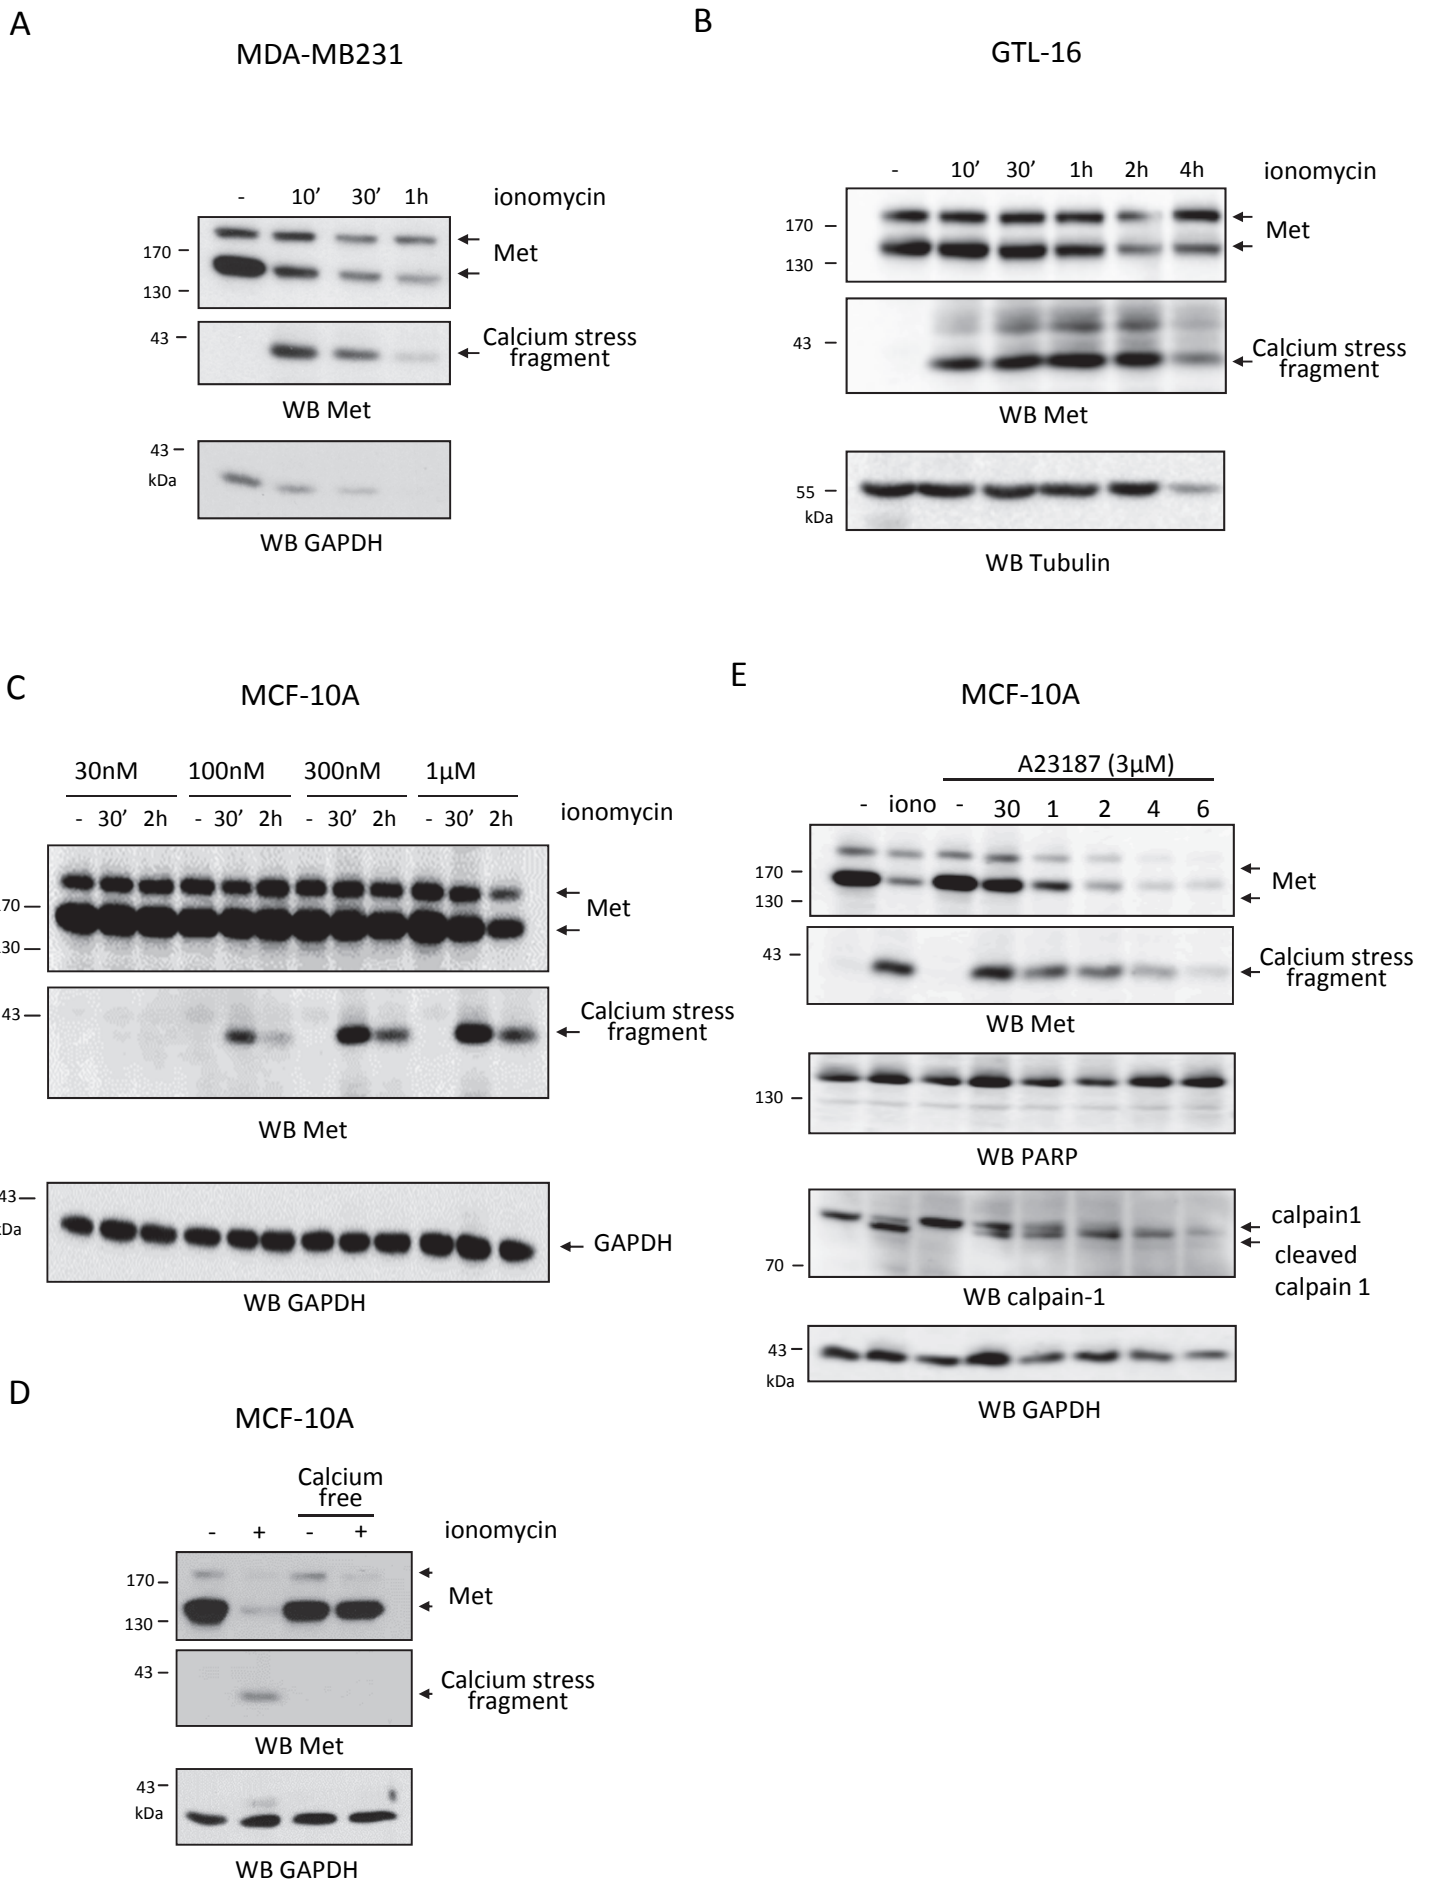

Supplementary Figure S1

A

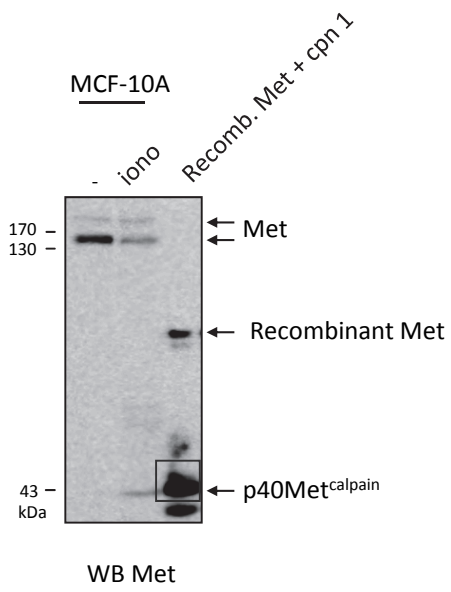

B

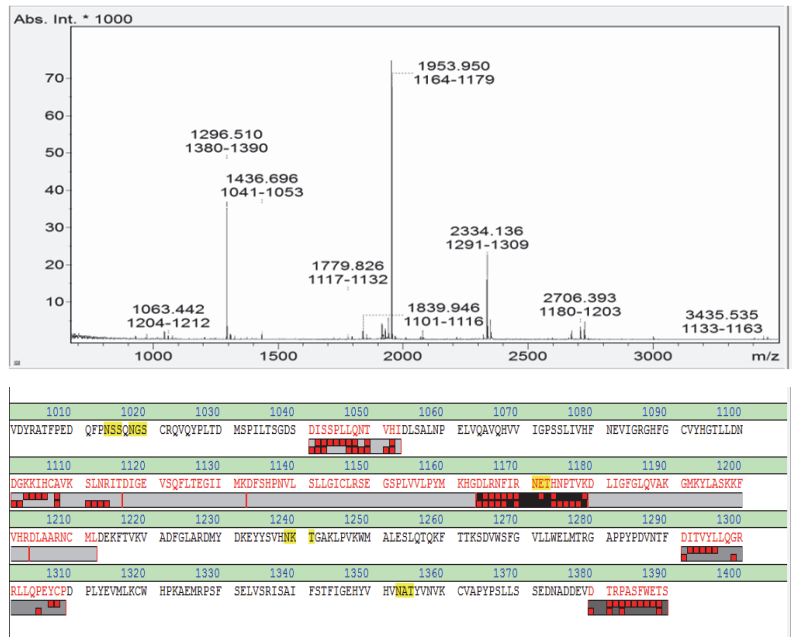

A

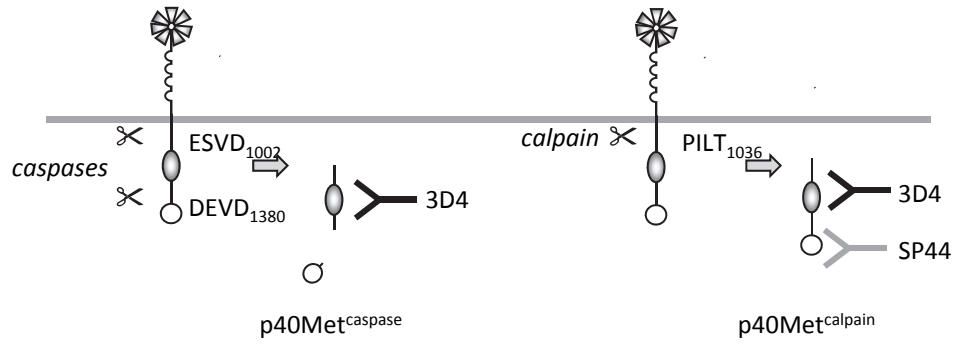

B

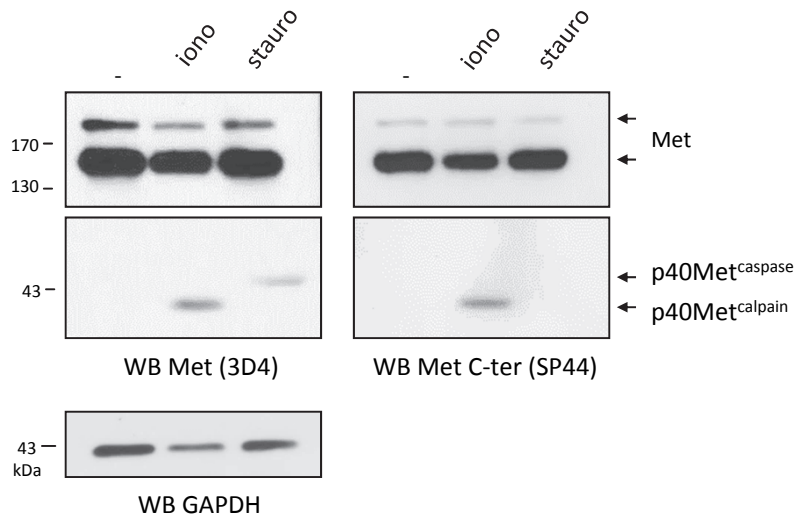

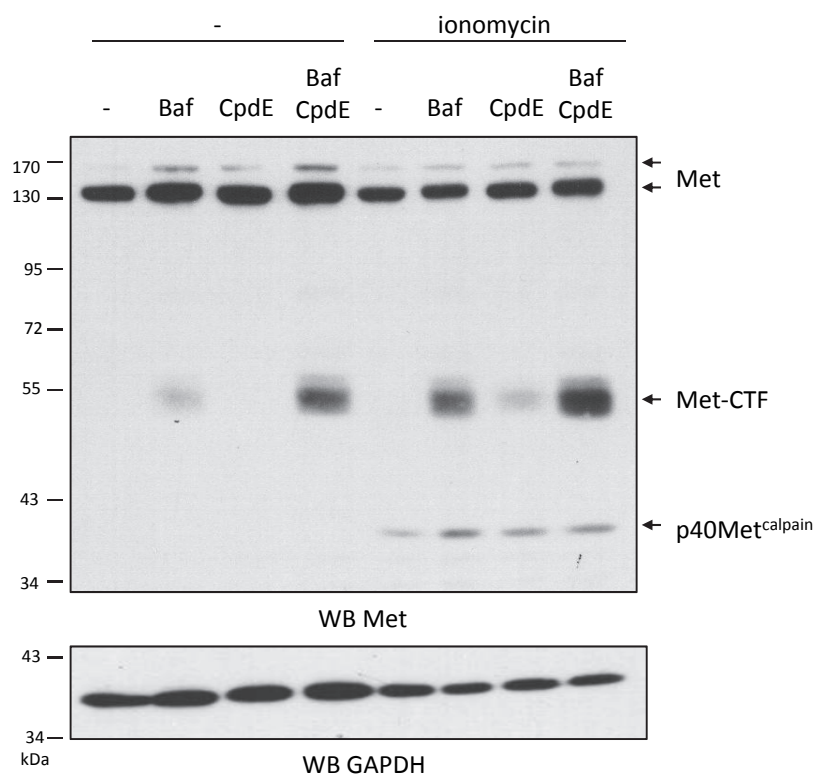

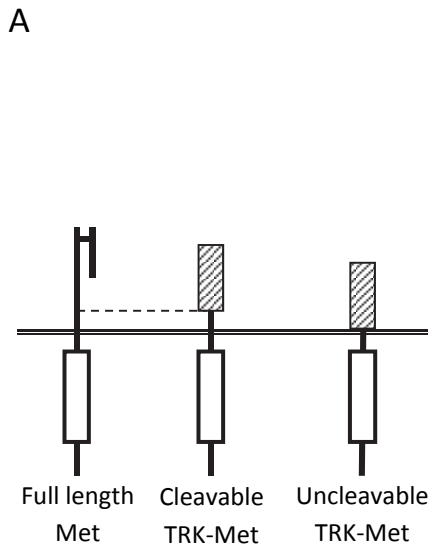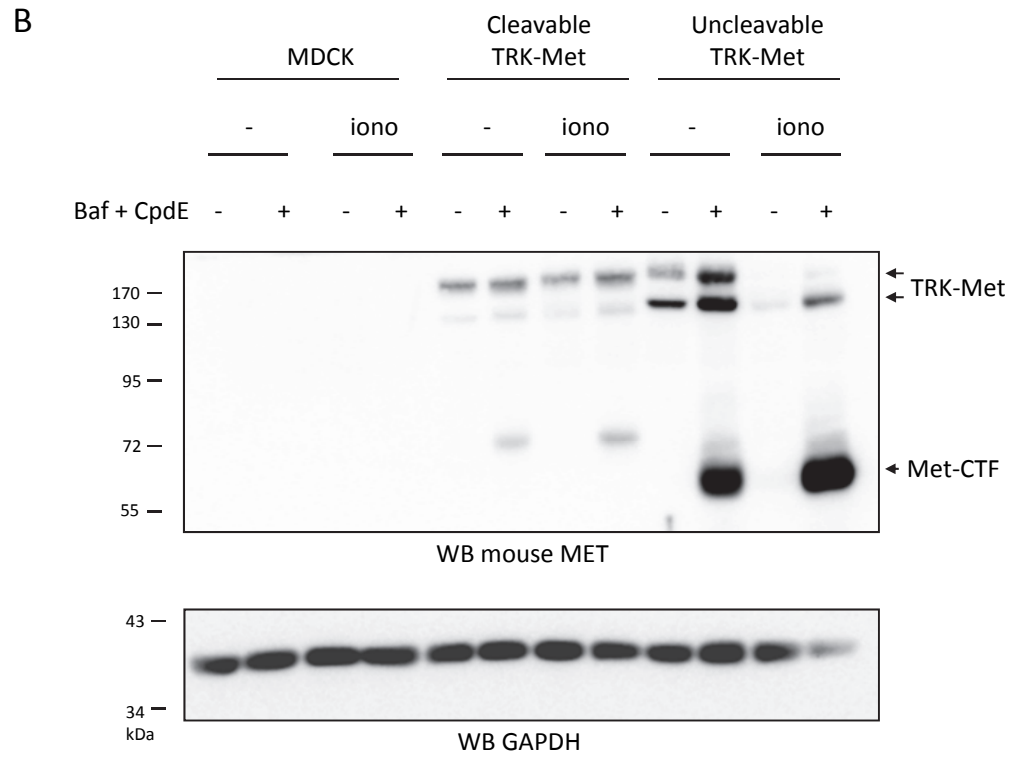

A

|                                 |                                | n  | %    |
|---------------------------------|--------------------------------|----|------|
| <b>Age (year)</b>               |                                |    |      |
|                                 | < 65                           | 10 | 77   |
|                                 | ≥ 65                           | 3  | 23   |
| <b>Sex</b>                      |                                |    |      |
|                                 | men                            | 7  | 53,8 |
|                                 | Women                          | 6  | 46,2 |
| <b>Histologic type</b>          |                                |    |      |
|                                 | Adenocarcinoma                 | 9  | 69,2 |
|                                 | Squamous cell carcinoma        | 2  | 15,4 |
|                                 | Large cell carcinoma           | 1  | 7,7  |
|                                 | Large cell endocrine carcinoma | 1  | 7,7  |
| <b>TNM stage</b>                |                                |    |      |
| T stage (tumor size)            | T1                             | 7  | 53,8 |
|                                 | T2                             | 4  | 30,8 |
|                                 | T3                             | 1  | 7,7  |
|                                 | T4                             | 1  | 7,7  |
| N stage (Lymph node)            | N0                             | 11 | 84,6 |
|                                 | N1                             | 2  | 15,4 |
|                                 | N2                             | 0  | 0    |
|                                 | N3                             | 0  | 0    |
|                                 | N2                             | 0  | 0    |
| M stage (metastasis)            | M0                             | 13 | 100  |
|                                 | M1                             | 0  | 0    |
| <b>Neoadjuvant chemotherapy</b> |                                |    |      |
|                                 | Yes                            | 2  | 15,4 |
|                                 | No                             | 11 | 84,6 |
| <b>WHO clinical stage</b>       |                                |    |      |
|                                 | 0                              | 11 | 84,6 |
|                                 | 1                              | 2  | 15,4 |
|                                 | 2, 3 or 4                      | 0  | 0    |
| <b>smoking</b>                  |                                |    |      |
|                                 | former smoker                  | 12 | 92,3 |
|                                 | smoker                         | 1  | 7,7  |
|                                 | non-smoker                     | 0  | 0    |

B

| Sample N° | Histologic type                     | Met Score (IHC) |
|-----------|-------------------------------------|-----------------|
| 1         | Adenocarcinoma                      | 0               |
| 2         | Adenocarcinoma                      | 0               |
| 3         | Large cell carcinoma                | 0               |
| 4         | Large cell neuroendocrine carcinoma | 0               |
| 5         | Squamous cell carcinoma             | +               |
| 6         | Adenocarcinoma                      | +               |
| 7         | Adenocarcinoma                      | ++              |
| 8         | Adenocarcinoma                      | ++              |
| 9         | Squamous cell carcinoma             | ++              |
| 10        | Adenocarcinoma                      | ++              |
| 11        | Adenocarcinoma                      | ++              |
| 12        | Adenocarcinoma                      | +++             |
| 13        | Adenocarcinoma                      | +++             |

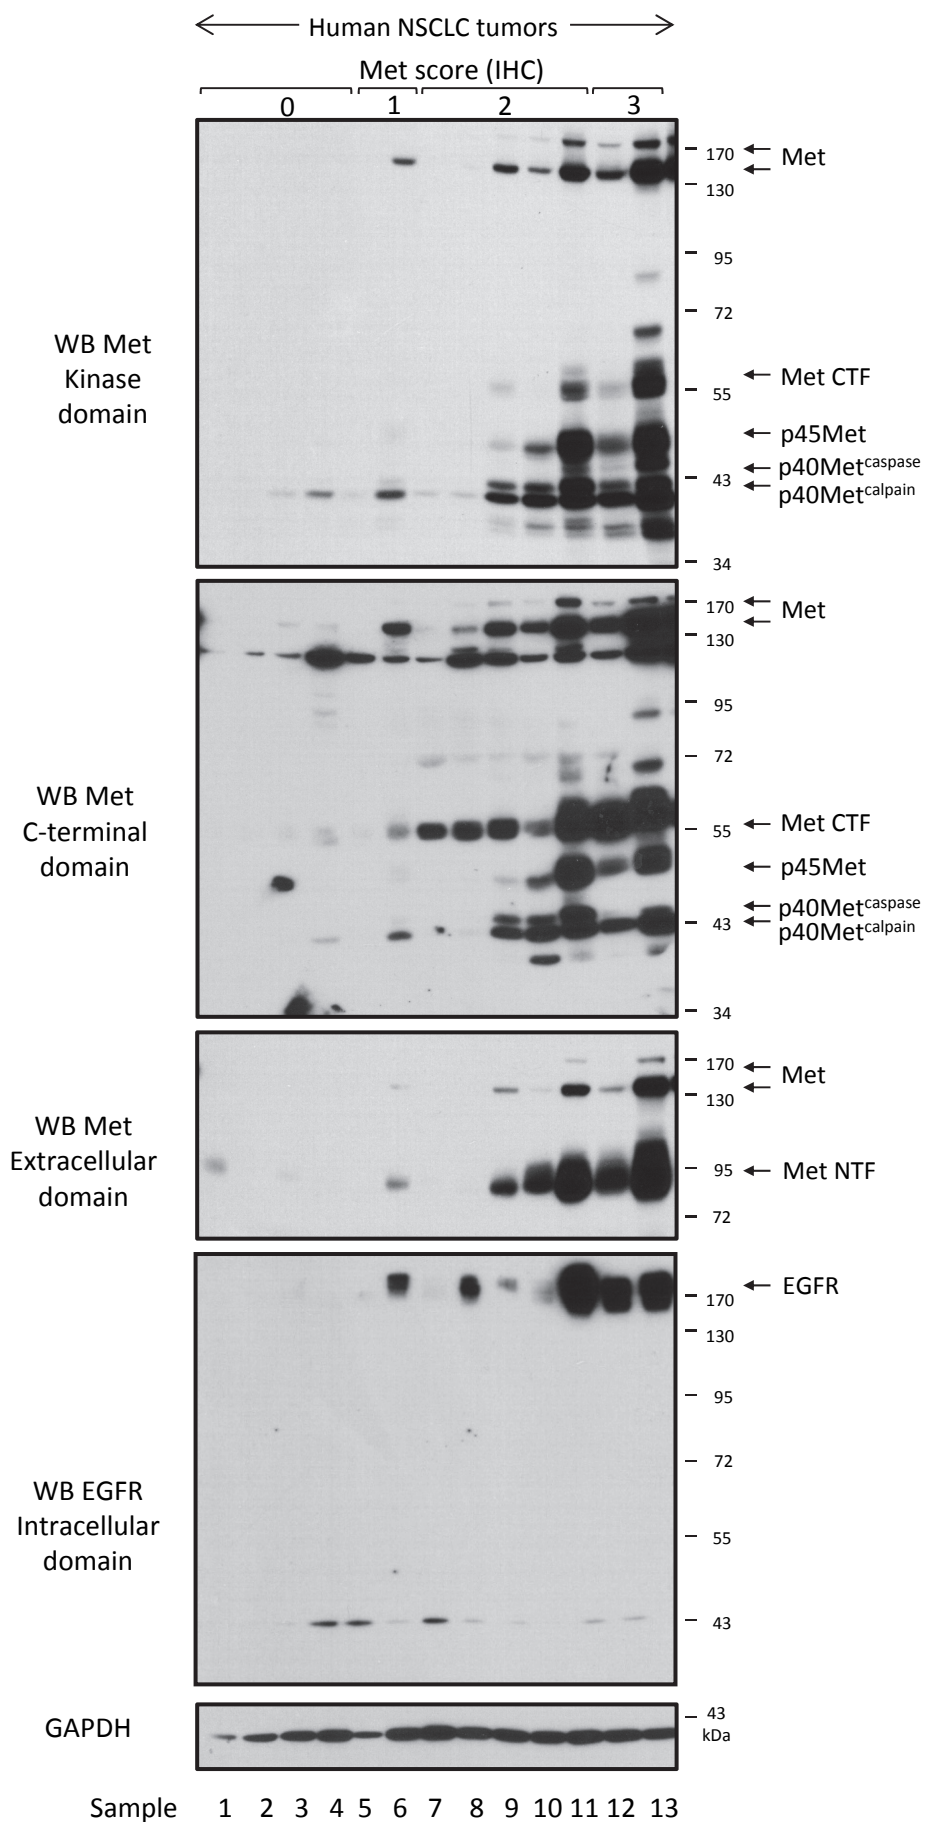

Supplementary Figure S7

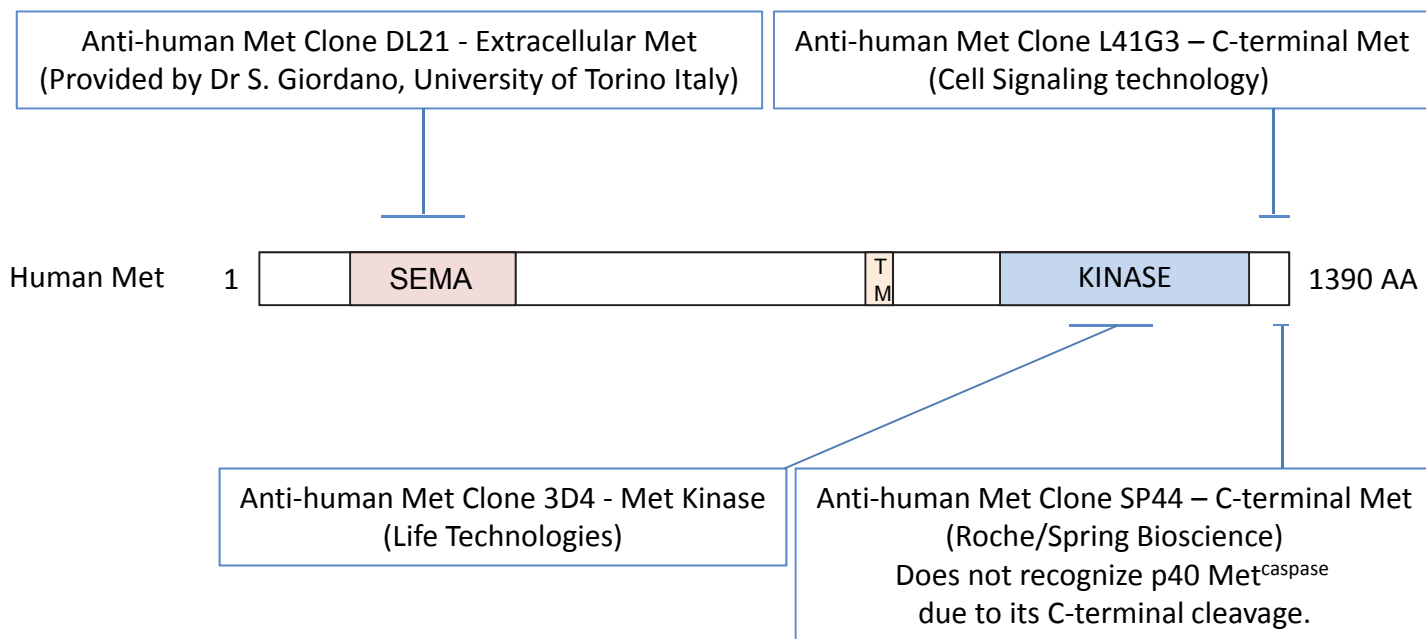

Supplement: cddis2015132x1.pdf [file cddis2015132x1.pdf]
